# Supplementary material for: Enhancing characterization of organic nitrogen components in aerosols and droplets using high-resolution aerosol mass spectrometry
Source: Copernicus journal article supplement (doi:10.5194/egusphere-2023-1542), 2023-08-10
Supplement: Supplementary file 1 [file egusphere-2023-1542-supplement.pdf]

## *Supplementary Material*

### **Enhancing characterization of organic nitrogen components in aerosols and droplets using high-resolution aerosol mass spectrometry**

Xinlei Ge<sup>1,2</sup>, Yele Sun<sup>1,3</sup>, Justin Trousdell<sup>1</sup>, Mindong Chen<sup>2</sup>, Qi Zhang<sup>1</sup>

<sup>1</sup>Department of Environmental Toxicology, University of California at Davis, One Shields Avenue, California 95616, United States

<sup>2</sup>Jiangsu Key Laboratory of Atmospheric Environment Monitoring and Pollution Control (AEMPC), Collaborative Innovation Center of Atmospheric Environment and Equipment Technology (AEEET), School of Environmental Science and Engineering, Nanjing University of Information Science & Technology, Nanjing 210044, China

<sup>3</sup>State Key Laboratory of Atmospheric Boundary Layer Physics and Atmospheric Chemistry, Institute of Atmospheric Physics, Chinese Academy of Sciences, Beijing 100029, China

*Correspondence to:* Q. Zhang ([dkwzhang@ucdavis.edu](mailto:dkwzhang@ucdavis.edu))

24 pages, 2 tables and 7 figures

Table S1. List of N-containing organic (ON) standards analyzed in this study.

| No. | Name                                 | Abbr. | Functional Groups | Chemical Formula                                        | Molecular weight      | Structure                                                                                                         |
|-----|--------------------------------------|-------|-------------------|---------------------------------------------------------|-----------------------|-------------------------------------------------------------------------------------------------------------------|
| 1   | Methylamine<br>(Hydrochloride)       | MA    | Amine             | CH <sub>5</sub> N<br>(HCl)                              | 31.0571<br>(36.4610)  | $\text{H}_3\text{C}-\text{NH}_2$                                                                                  |
| 2   | Dimethylamine<br>(Hydrochloride)     | DMA   | Amine             | C <sub>2</sub> H <sub>7</sub> N<br>(HCl)                | 45.0837<br>(36.4610)  | $\text{H}_3\text{C}-\text{NH}-\text{CH}_3$                                                                        |
| 3   | Trimethylamine<br>(Hydrochloride)    | TMA   | Amine             | C <sub>3</sub> H <sub>9</sub> N<br>(HCl)                | 59.1103<br>(36.4610)  | $\text{H}_3\text{C}-\text{N}(\text{CH}_3)_2$                                                                      |
| 4   | Ethylamine<br>(Hydrochloride)        | EA    | Amine             | C <sub>2</sub> H <sub>7</sub> N<br>(HCl)                | 45.0837<br>(36.4610)  | $\text{H}_3\text{C}-\text{CH}_2-\text{NH}_2$                                                                      |
| 5   | Diethylamine<br>(Hydrochloride)      | DEA   | Amine             | C <sub>4</sub> H <sub>11</sub> N<br>(HCl)               | 73.1368<br>(36.4610)  | $\text{H}_3\text{C}-\text{CH}_2-\text{NH}-\text{CH}_2-\text{CH}_3$                                                |
| 6   | Triethylamine<br>(Hydrochloride)     | TEA   | Amine             | C <sub>6</sub> H <sub>15</sub> N<br>(HCl)               | 101.1900<br>(36.4610) | $\text{H}_3\text{C}-\text{CH}_2-\text{N}(\text{CH}_2\text{CH}_3)_2$                                               |
| 7   | Isopropylamine<br>(Hydrochloride)    | iPPA  | Amine             | C <sub>3</sub> H <sub>9</sub> N<br>(HCl)                | 59.11<br>(36.4610)    | $\text{H}_3\text{C}-\text{CH}(\text{CH}_3)-\text{NH}_2$                                                           |
| 8   | Butylamine<br>(Hydrochloride)        | BTA   | Amine             | C <sub>4</sub> H <sub>11</sub> N<br>(HCl)               | 73.14<br>(36.4610)    | $\text{H}_3\text{C}-\text{CH}_2-\text{CH}_2-\text{CH}_2-\text{NH}_2$                                              |
| 9   | Isobutylamine<br>(Hydrochloride)     | iBTA  | Amine             | C <sub>4</sub> H <sub>11</sub> N<br>(HCl)               | 73.14<br>(36.4610)    | $\text{H}_3\text{C}-\text{CH}(\text{CH}_3)-\text{CH}_2-\text{NH}_2$                                               |
| 10  | 1,4-Diaminobutane<br>(Hydrochloride) | BDA   | Amine             | C <sub>4</sub> H <sub>12</sub> N <sub>2</sub><br>(2HCl) | 88.15<br>(72.9220)    | $\text{H}_2\text{N}-\text{CH}_2-\text{CH}_2-\text{CH}_2-\text{CH}_2-\text{NH}_2$                                  |
| 11  | Pentylamine<br>(Hydrochloride)       | PTA   | Amine             | C <sub>5</sub> H <sub>13</sub> N<br>(HCl)               | 87.16<br>(36.4610)    | $\text{H}_3\text{C}-\text{CH}_2-\text{CH}_2-\text{CH}_2-\text{CH}_2-\text{NH}_2$                                  |
| 12  | Tributylamine<br>(Hydrochloride)     | TBA   | Amine             | C <sub>12</sub> H <sub>27</sub> N<br>(HCl)              | 185.3495<br>(36.4610) | $\text{H}_3\text{C}-\text{CH}_2-\text{CH}_2-\text{CH}_2-\text{N}(\text{CH}_2\text{CH}_2\text{CH}_2\text{CH}_3)_2$ |

|    |                                                                  |       |       |                          |                       |                                                                                       |
|----|------------------------------------------------------------------|-------|-------|--------------------------|-----------------------|---------------------------------------------------------------------------------------|
| 13 | Tri-n-amyliamie<br>(Hydrochloride)                               | TAA   | Amine | $C_{15}H_{33}N$<br>(HCl) | 227.4292<br>(36.4610) | 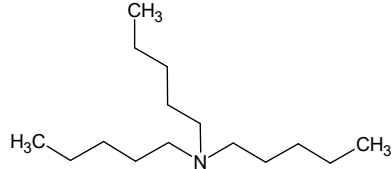   |
| 14 | Piperazine<br>(Dihydrochloride)                                  | PIP   | Amine | $C_4H_{10}N_2$<br>(2HCl) | 86.1356<br>(72.9220)  |    |
| 15 | 1-(3-Dimethylaminopropyl)-3-ethylcarbodiimide<br>(Hydrochloride) | DMPED | Amine | $C_8H_{17}N_3$<br>(HCl)  | 155.2407<br>(36.4610) |    |
| 16 | Hexamethonium chloride                                           | HM    | Amine | $C_{12}H_{30}N_2(Cl_2)$  | 202.3800<br>(70.9060) |    |
| 17 | Benzylamine<br>(Hydrochloride)                                   | BZA   | Amine | $C_7H_9N$<br>(HCl)       | 107.1531<br>(36.4610) |    |
| 18 | Benzamidine<br>(Hydrochloride)                                   | BZD   | Amine | $C_7H_8N_2$ (HCl)        | 120.1518<br>(36.4610) |  |
| 19 | 1,3-phenylenediamine<br>(Dihydrochloride)                        | PHLDA | Amine | $C_6H_8N_2$ (2HCl)       | 108.1411<br>(72.9220) |  |
| 20 | Ethanolamine<br>Also tried MEA.HCl                               | EAOH  | Amine | $C_2H_7NO$               | 61.0831               |  |
| 21 | Diethanolamine<br>(Hydrochloride)                                | DEAOH | Amine | $C_4H_{11}NO_2$<br>(HCl) | 105.1356<br>(36.4610) |  |
| 22 | Triethanolamine                                                  | TEAOH | Amine | $C_6H_{15}NO_3$          | 149.1882              |  |
| 23 | Methyldiethanolamine<br>(Hydrochloride)                          | MDEA  | Amine | $C_5H_{13}NO_2$<br>(HCl) | 119.1622<br>(36.4610) |  |
| 24 | 2-Amino-2-methyl-1-propanol<br>(Hydrochloride)                   | AMP   | Amine | $C_4H_{11}NO$<br>(HCl)   | 89.1362<br>(36.4610)  |  |

|    |                                   |       |       |                      |                       |  |
|----|-----------------------------------|-------|-------|----------------------|-----------------------|--|
| 25 | Bis(2-hydroxypropyl)amine         | BOHA  | Amine | $C_6H_{15}NO_2$      | 133.1888              |  |
| 26 | 4-Aminophenol (Hydrochloride)     | APA   | Amine | $C_6H_7NO$<br>(HCl)  | 109.1259<br>(36.4610) |  |
| 27 | Ethylene diamine tetraacetic acid | EDTA  | Amine | $C_{10}H_{16}N_2O_8$ | 292.2426              |  |
| 28 | Urea                              | UREA  | Amide | $CH_4N_2O$           | 60.0553               |  |
| 29 | Benzamide                         | BZAM  | Amide | $C_7H_7NO$           | 121.1366              |  |
| 30 | N,N'-Methylenebisacrylamide       | NMAM  | Amide | $C_7H_{10}N_2O_2$    | 154.1665              |  |
| 31 | Nicotinamide                      | NCAM  | Amide | $C_6H_6N_2O$         | 122.1246              |  |
| 32 | Pyrazinecarboxamide               | PRCAM | Amide | $C_5H_5N_3O$         | 123.1127              |  |
| 33 | Acetaminophenol                   | AAP   | Amide | $C_8H_9NO_2$         | 151.1626              |  |

|    |                             |       |            |                 |          |                                                                                       |
|----|-----------------------------|-------|------------|-----------------|----------|---------------------------------------------------------------------------------------|
| 34 | Glycine                     | GLY   | Amino Acid | $C_2H_5NO_2$    | 75.0666  | 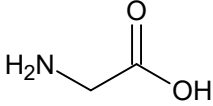   |
| 35 | L-Alanine                   | ALA   | Amino Acid | $C_3H_7NO_2$    | 89.0932  |    |
| 36 | $\gamma$ -Aminobutyric acid | GABA  | Amino Acid | $C_4H_9NO_2$    | 103.1198 |    |
| 37 | R-2-aminobutyric acid       | RGABA | Amino Acid | $C_4H_9NO_2$    | 103.1198 |    |
| 38 | L-Serine                    | SER   | Amino Acid | $C_3H_7NO_3$    | 105.0926 |    |
| 39 | L-Proline                   | PRO   | Amino Acid | $C_5H_9NO_2$    | 115.1305 |  |
| 40 | L-Valine                    | VAL   | Amino Acid | $C_5H_{11}NO_2$ | 117.1463 |  |
| 41 | L-Threonine                 | THR   | Amino Acid | $C_4H_9NO_3$    | 119.1192 |  |
| 42 | L-Cysteine                  | CYS   | Amino Acid | $C_3H_7NO_2S$   | 121.1580 |  |

|    |                                |       |            |                            |                       |                                                                                       |
|----|--------------------------------|-------|------------|----------------------------|-----------------------|---------------------------------------------------------------------------------------|
| 43 | L-Isoleucine                   | ILE   | Amino Acid | $C_6H_{13}NO_2$            | 131.1729              | 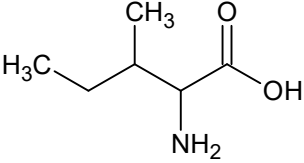   |
| 44 | L-Leucine                      | LEU   | Amino Acid | $C_6H_{13}NO_2$            | 131.1729              |    |
| 45 | trans-4-hydroxyl-proline       | PROOH | Amino Acid | $C_5H_9NO_3$               | 131.1299              |    |
| 46 | L-Asparagine                   | ASN   | Amino Acid | $C_4H_8N_2O_3$             | 132.1179              |    |
| 47 | L-Ornithine<br>(Hydrochloride) | ORN   | Amino Acid | $C_5H_{12}N_2O_2$<br>(HCl) | 132.1610<br>(34.4610) |   |
| 48 | L-Aspartic Acid                | ASP   | Amino Acid | $C_4H_7NO_4$               | 133.1027              |  |
| 49 | L-Glutamine                    | GLN   | Amino Acid | $C_5H_{10}N_2O_3$          | 146.1445              |  |
| 50 | L-Lysine                       | LYS   | Amino Acid | $C_6H_{14}N_2O_2$          | 146.1876              |  |
| 51 | L-Glutamic Acid                | GLU   | Amino Acid | $C_5H_9NO_4$               | 147.1293              |  |

|    |                                               |       |                     |                                          |                              |  |
|----|-----------------------------------------------|-------|---------------------|------------------------------------------|------------------------------|--|
| 52 | L-Methionine                                  | MET   | Amino Acid          | $C_5H_{11}NO_2S$                         | 149.2110                     |  |
| 53 | L-Histidine<br>(Monochloride.<br>Monohydrate) | HIS   | Amino Acid          | $C_6H_9N_3O_2$<br>(HCl·H <sub>2</sub> O) | 155.1546<br>(36.4610+18.013) |  |
| 54 | L-Methionine Sulfoxide                        | METSO | Amino Acid          | $C_5H_{11}NO_3S$                         | 165.2110                     |  |
| 55 | L-Phenylalanine                               | PHE   | Amino Acid          | $C_9H_{11}NO_2$                          | 165.1891                     |  |
| 56 | L-Arginine<br>(Hydrochloride)                 | ARG   | Amino Acid          | $C_6H_{14}N_4O_2$<br>(HCl)               | 174.2010<br>(36.4610)        |  |
| 57 | L-Tyrosine                                    | TYR   | Amino Acid          | $C_9H_{11}NO_3$                          | 181.1885                     |  |
| 58 | L-Tryptophan                                  | TRP   | Amino Acid          | $C_{11}H_{12}N_2O_2$                     | 204.2252                     |  |
| 59 | 4-Aminobenzoic acid                           | ABA   | Amino acid          | $C_7H_7NO_2$                             | 137.1360                     |  |
| 60 | 4-Nitroimidazole                              | NID   | Nitro-<br>compounds | $C_3H_3N_3O_2$                           | 113.0748                     |  |

|    |                           |      |                 |              |          |                                                                                       |
|----|---------------------------|------|-----------------|--------------|----------|---------------------------------------------------------------------------------------|
| 61 | 4-Nitrophenol             | NPH  | Nitro-compounds | $C_6H_5NO_3$ | 139.1088 | 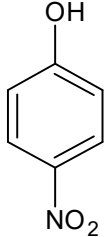   |
| 62 | 2-Nitrobenzaldehyde       | NBAD | Nitro-compounds | $C_7H_5NO_3$ | 151.1195 |    |
| 63 | 2-nitrobenzyl alcohol     | NBAC | Nitro-compounds | $C_7H_7NO_3$ | 153.1354 |    |
| 64 | Pyrazole                  | PRZ  | N-heterocycle   | $C_3H_4N_2$  | 68.0773  |    |
| 65 | Imidazole                 | ID   | N-heterocycle   | $C_3H_4N_2$  | 68.0773  |  |
| 66 | Pyrrole-2-carboxylic acid | PRCA | N-heterocycle   | $C_5H_5NO_2$ | 111.0987 |  |
| 67 | 2-Picolinic acid          | PCA  | N-heterocycle   | $C_6H_5NO_2$ | 123.1094 |  |
| 68 | Nicotinic acid            | NCA  | N-heterocycle   | $C_6H_5NO_2$ | 123.1094 |  |



|    |                          |         |                 |                                                           |                    |                                                                                     |
|----|--------------------------|---------|-----------------|-----------------------------------------------------------|--------------------|-------------------------------------------------------------------------------------|
| 69 | Indole-3-carboxylic acid | IDCA    | N-heterocycle   | C <sub>9</sub> H <sub>7</sub> NO <sub>2</sub>             | 161.1574           | 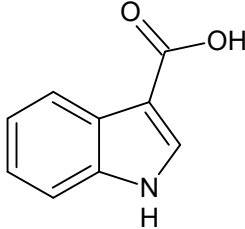 |
| 70 | Thiamine (hydrochloride) | THA     | N-heterocycle   | C <sub>12</sub> H <sub>17</sub> ClN <sub>4</sub> OS (HCl) | 300.8076 (36.4610) |  |
| 71 | Amino acid standard      | AS      | Amino Acid      | -                                                         | -                  | Physiological acidics and neutrals                                                  |
| 72 | Protein                  | PROTEIN | Protein         | -                                                         | -                  | Cytochrome C from horse heart                                                       |
| 73 | Elliott Soil             | HA      | Humic substance | -                                                         | -                  | Standard HA from IHSS*, No. 1S102H                                                  |
| 74 | Waskish Peat             | FA      | Humic substance | -                                                         | -                  | Reference HA from IHSS, No. 1R107F                                                  |
| 75 | Suwannee River           | NOM     | Humic substance | -                                                         | -                  | Aquatic NOM (Natural Organic Matter) from IHSS, No. 1R101N                          |

\*International Humic Substances Society (<http://www.ihss.gatech.edu/>).

Table S2. List of the N-containing organic (ON) standards used to make the 1:1 (mass ratio) mixtures with sulfate (in ammonium sulfate).

| No.      | ID.<br>in Table S1 | Name                                      | No.       | ID.<br>in Table S1 | Name                                    |
|----------|--------------------|-------------------------------------------|-----------|--------------------|-----------------------------------------|
| <b>1</b> | 1                  | Methylamine<br>(Hydrochloride)            | <b>10</b> | 34                 | Glycine                                 |
| <b>2</b> | 2                  | Dimethylamine<br>(Hydrochloride)          | <b>11</b> | 35                 | L-Alanine                               |
| <b>3</b> | 3                  | Trimethylamine<br>(Hydrochloride)         | <b>12</b> | 39                 | L-Proline                               |
| <b>4</b> | 4                  | Ethylamine<br>(Hydrochloride)             | <b>13</b> | 41                 | L-Threonine                             |
| <b>5</b> | 5                  | Diethylamine<br>(Hydrochloride)           | <b>14</b> | 42                 | L-Cysteine<br>(Hydrochloride)           |
| <b>6</b> | 6                  | Triethylamine<br>(Hydrochloride)          | <b>15</b> | 59                 | 4-Aminobenzonic<br>acid                 |
| <b>7</b> | 20                 | Ethanolamine<br>(Hydrochloride)           | <b>16</b> | 68                 | Nicotinic acid                          |
| <b>8</b> | 19                 | 1,3-phenylenediamine<br>(Dihydrochloride) | <b>17</b> | 23                 | Methyldiethanolamine<br>(Hydrochloride) |
| <b>9</b> | 33                 | Acetaminophenol                           | <b>18</b> | 14                 | Piperazine<br>(Dihydrochloride)         |

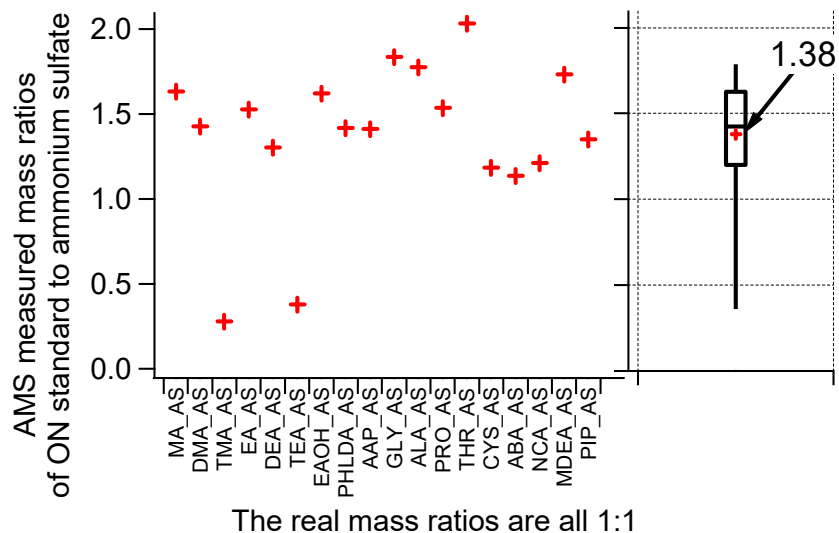

Figure S1. AMS measured mass ratios of the mixtures of different ON standards with ammonium sulfate. All mass ratios of the mixtures are prepared in 1:1 (the whiskers above and below the boxes indicate the 90<sup>th</sup> and 10<sup>th</sup> percentiles, the upper and lower boundaries of the boxes indicate the 75<sup>th</sup> and 25<sup>th</sup> percentiles, and the lines in the boxes indicate the median values and the cross symbols indicate the mean values).

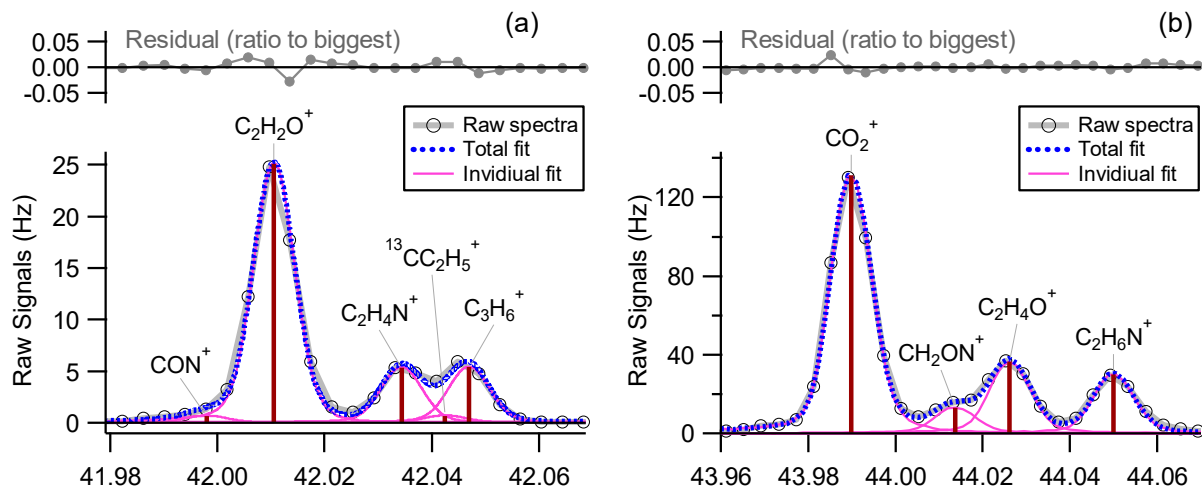

Figure S2. Examples of high resolution mass spectral analysis of (a)  $m/z$  42 and (b)  $m/z$  44.

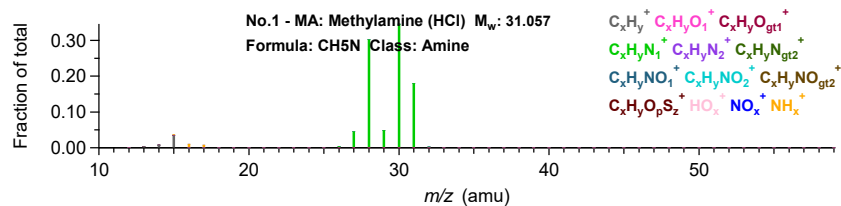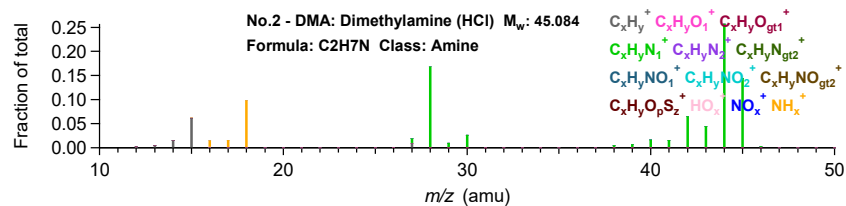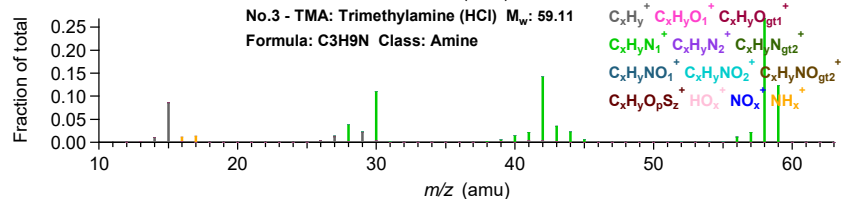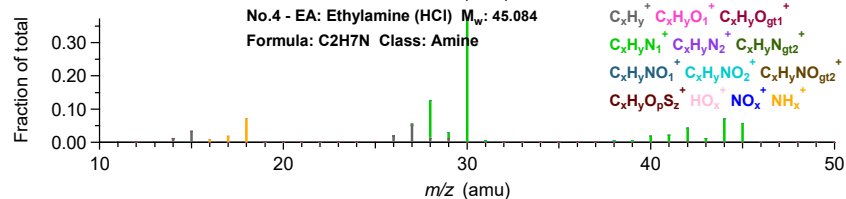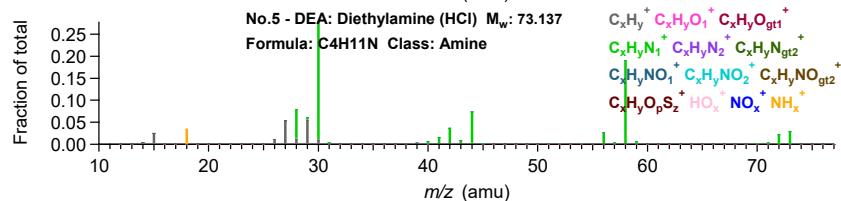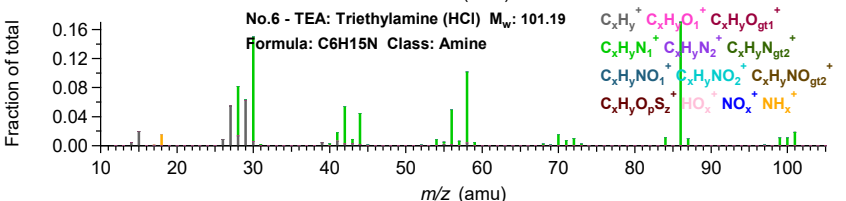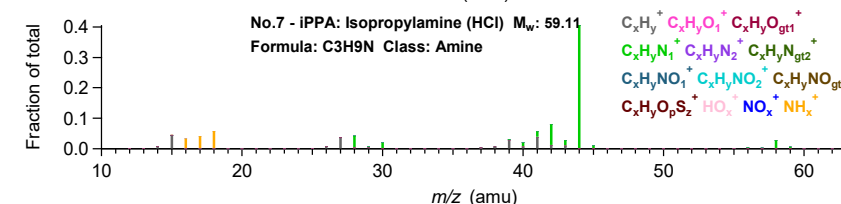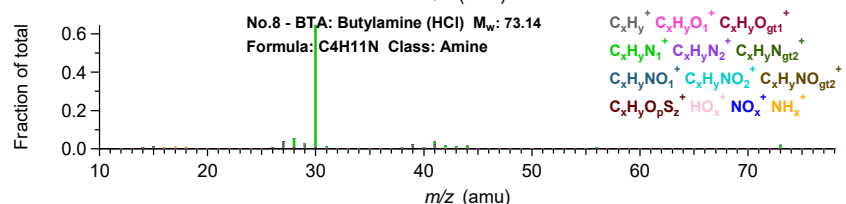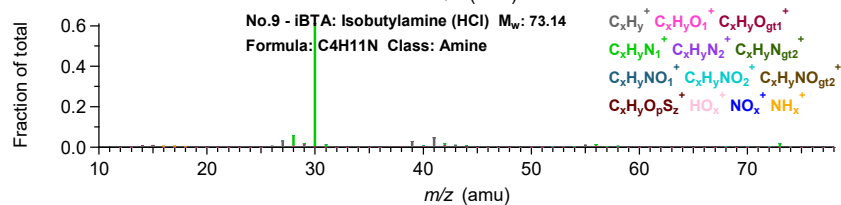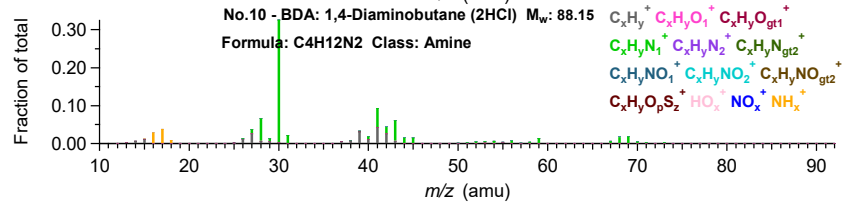

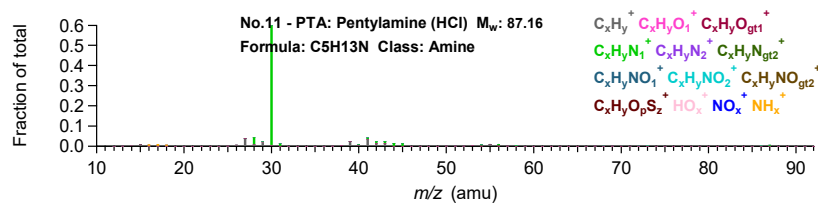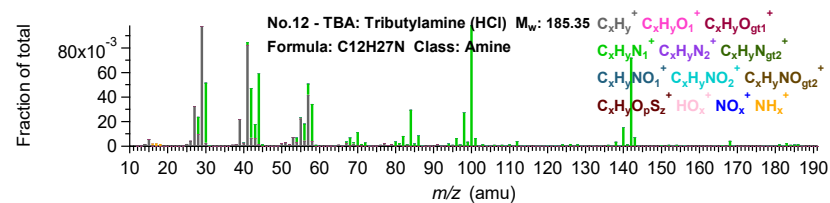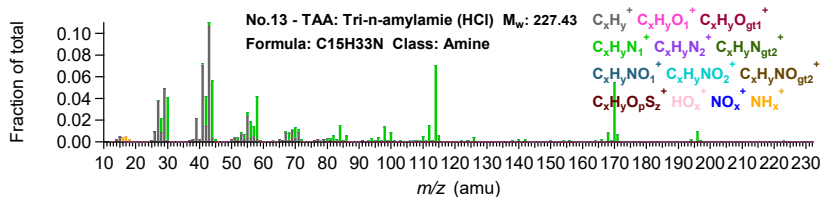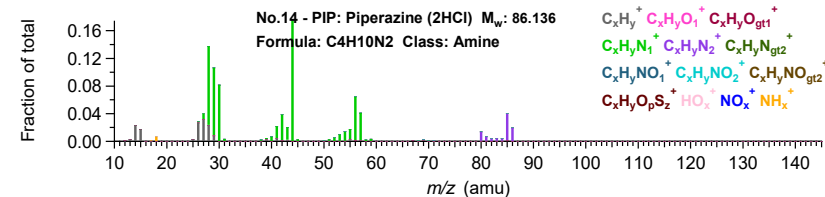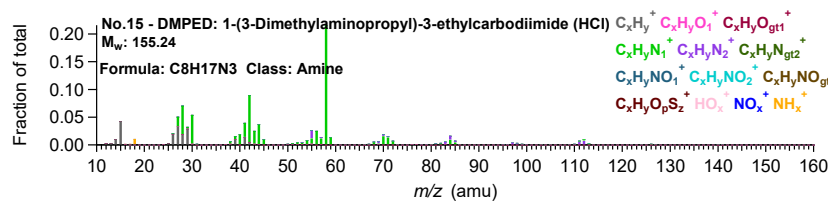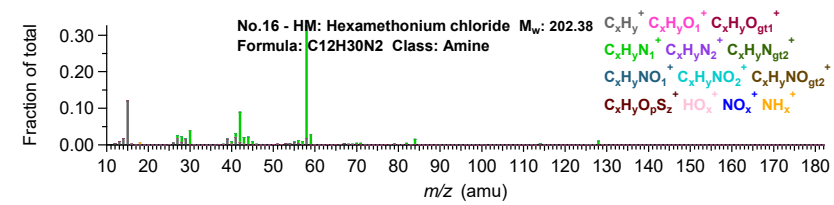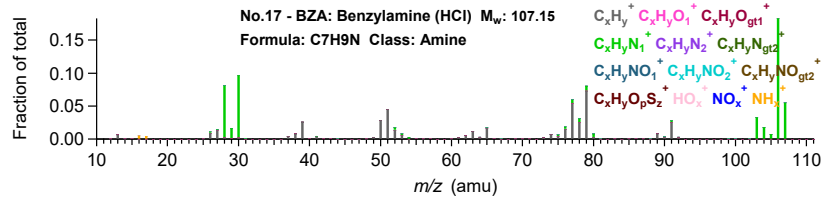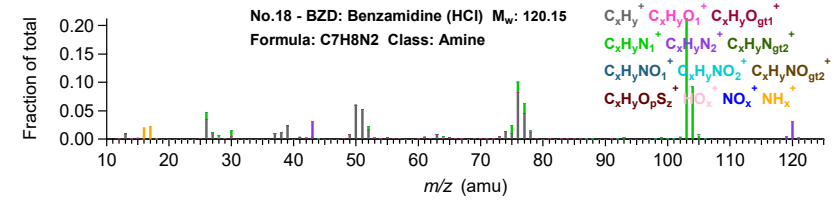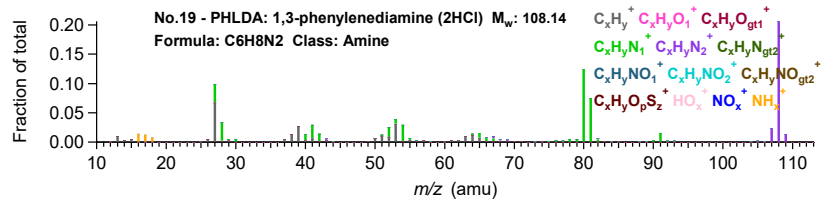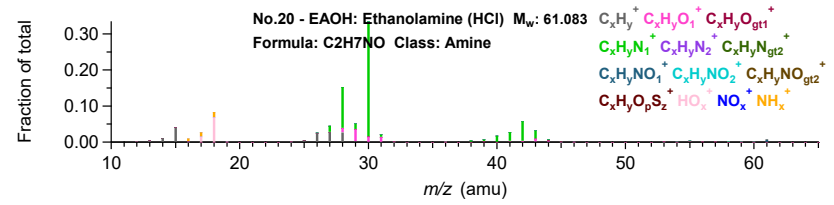

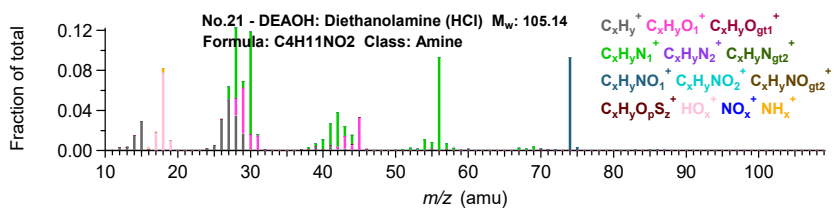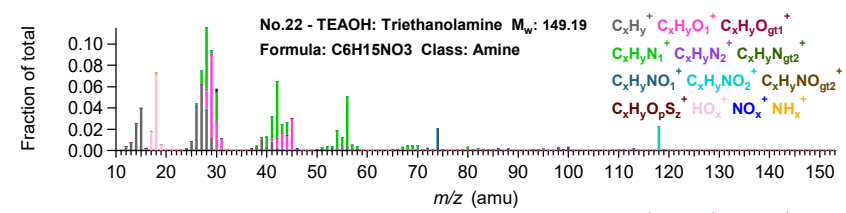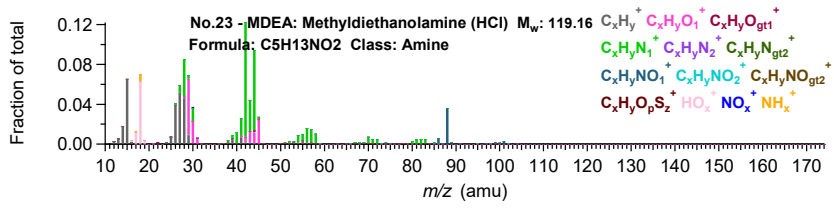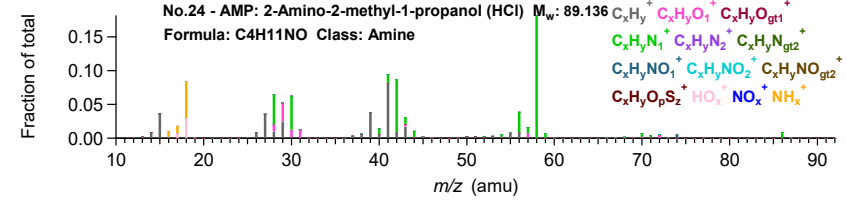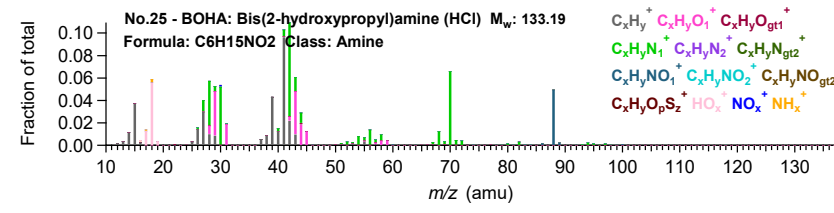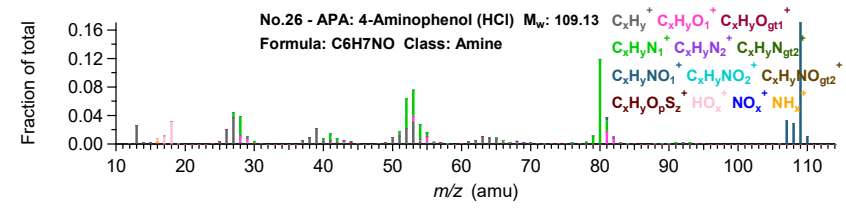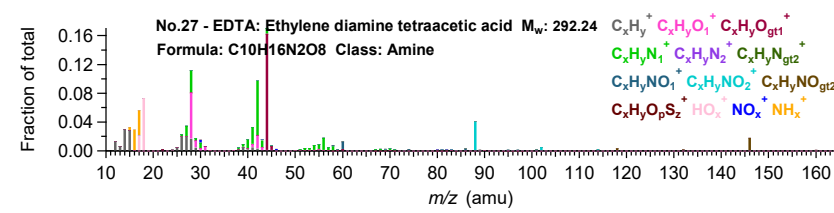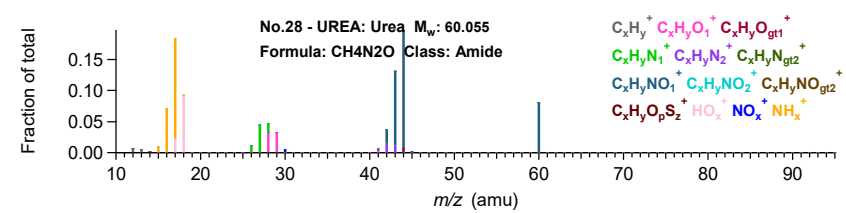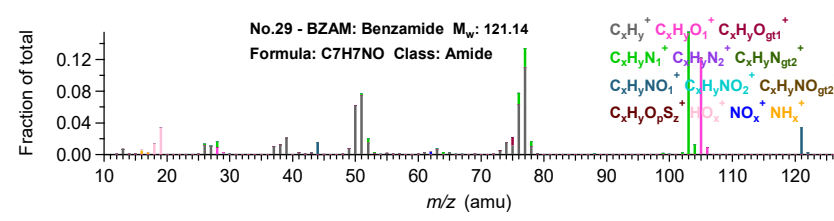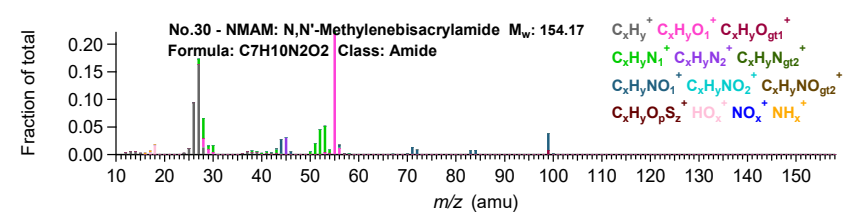

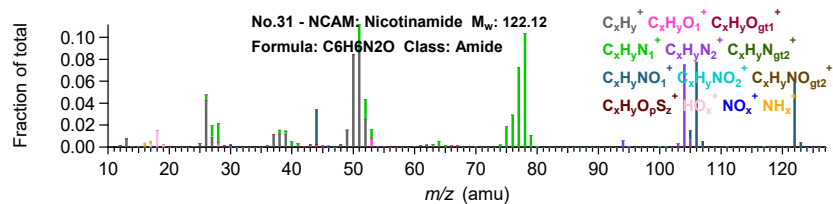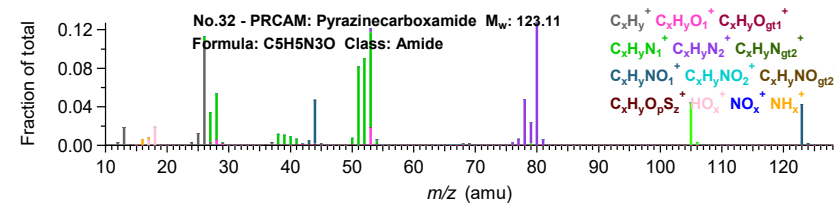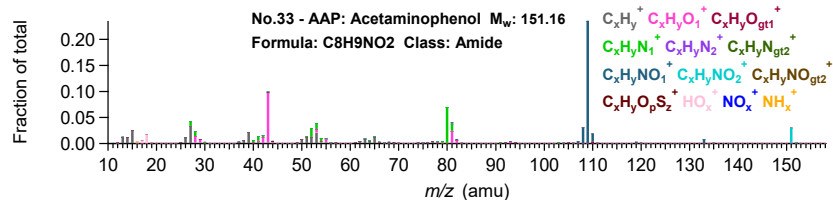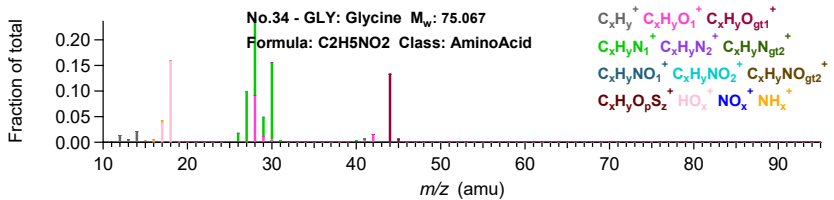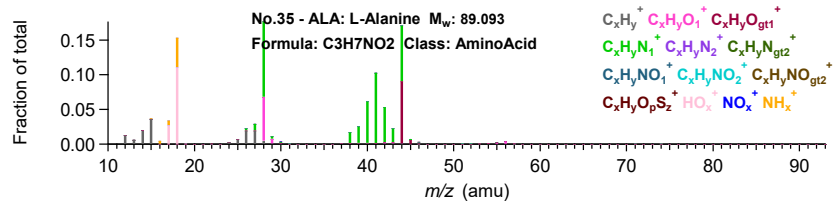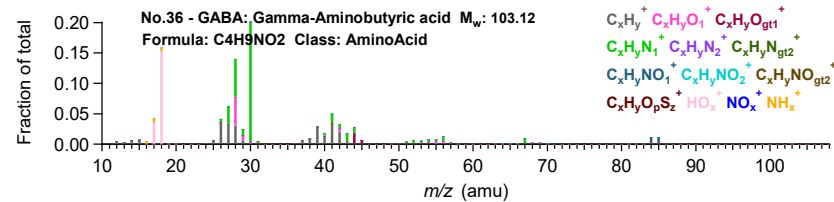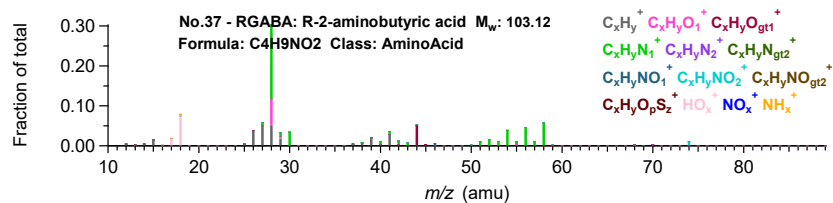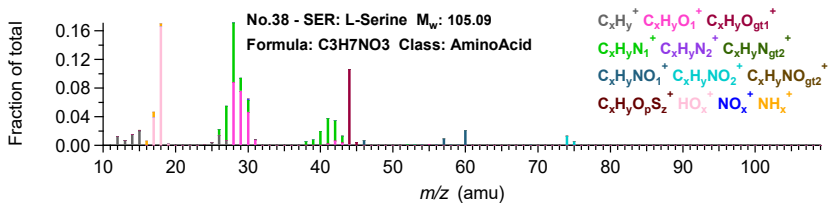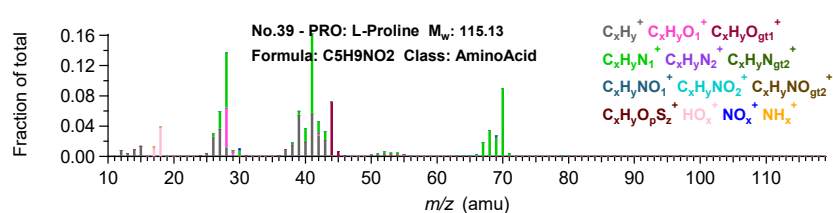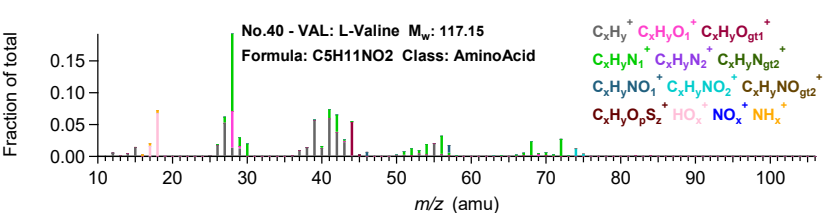



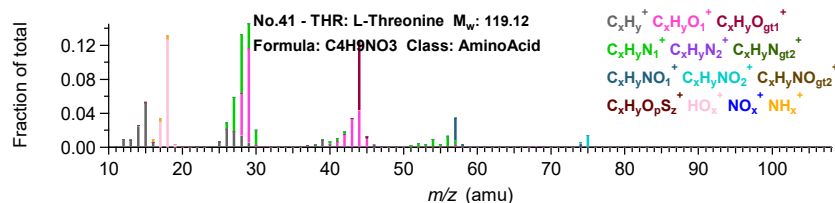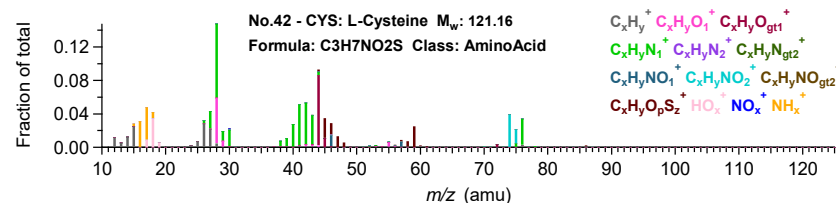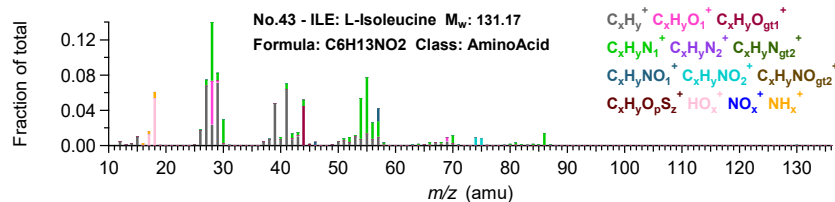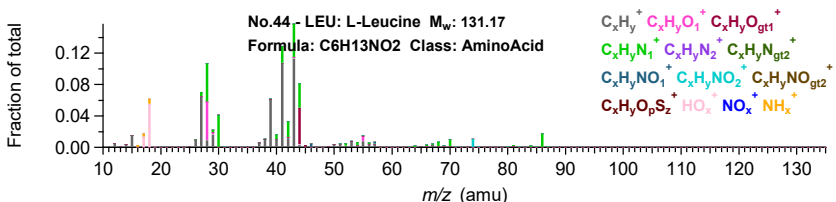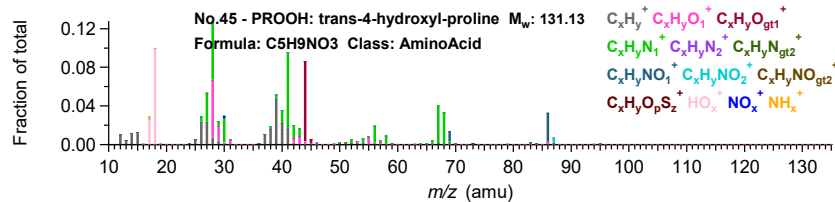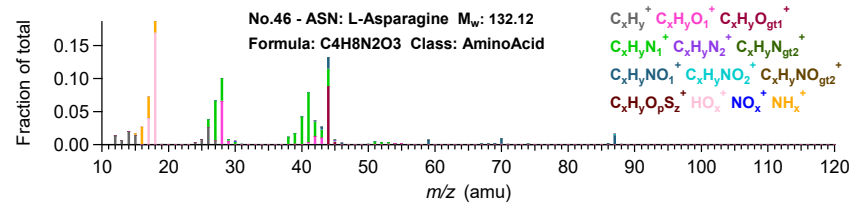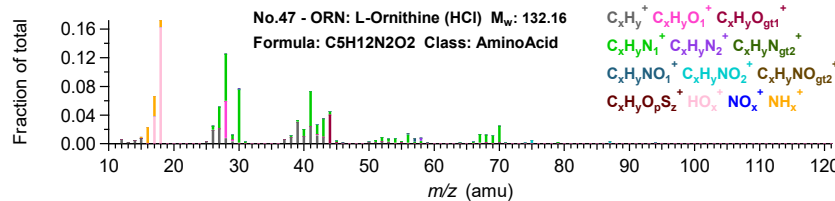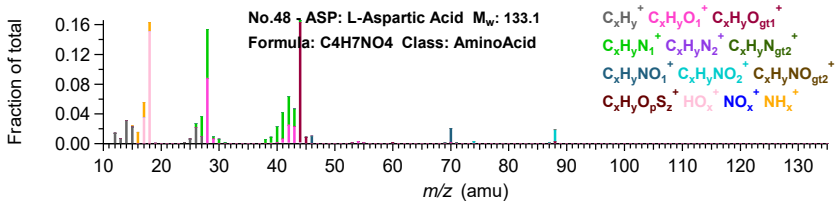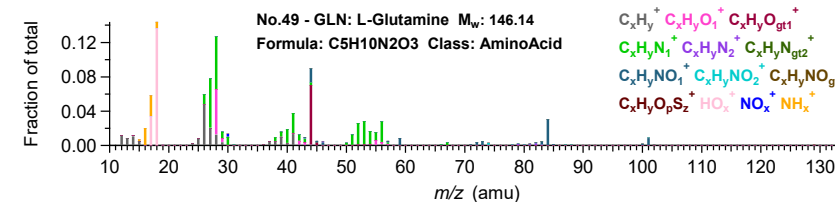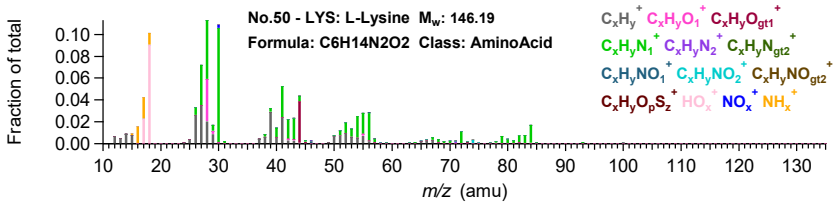



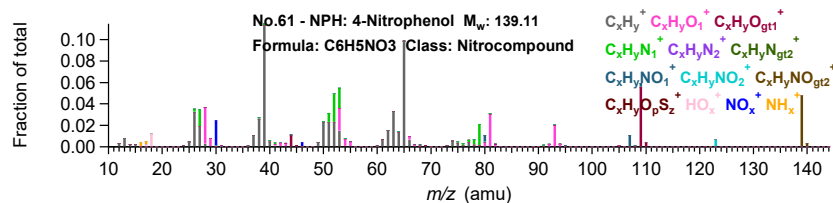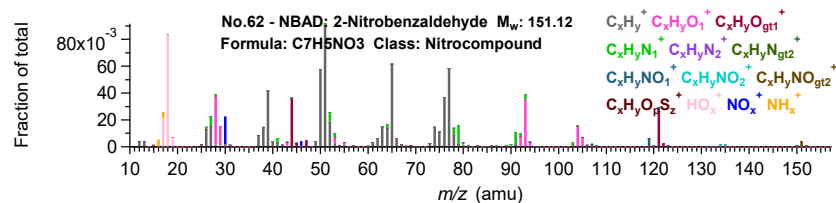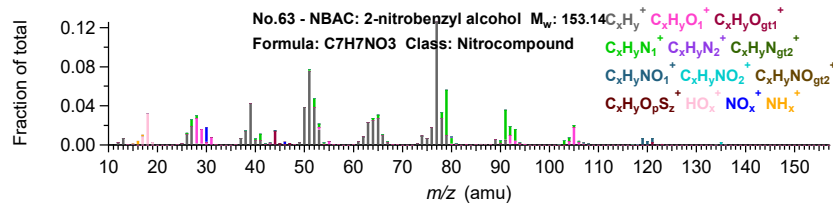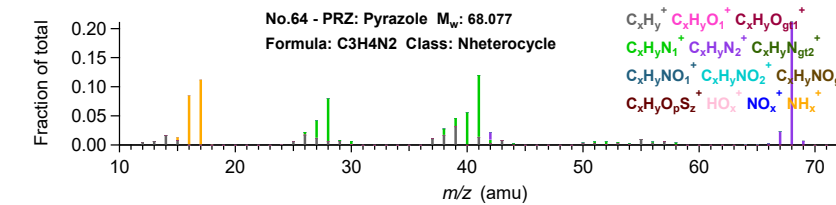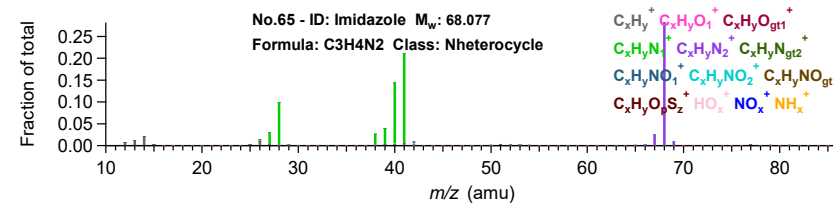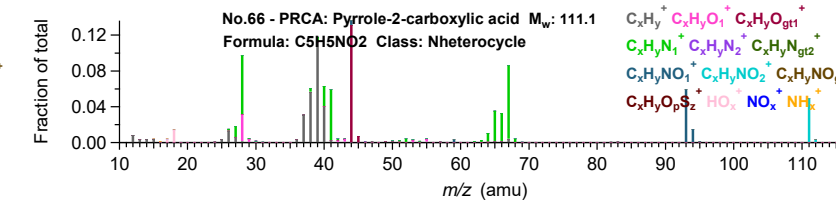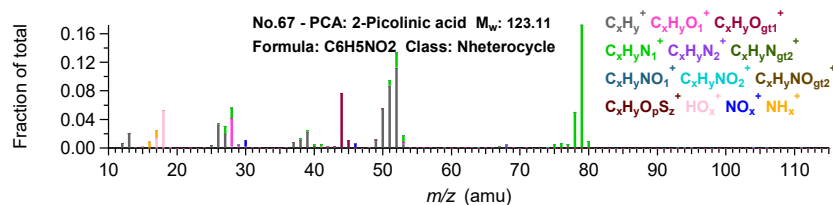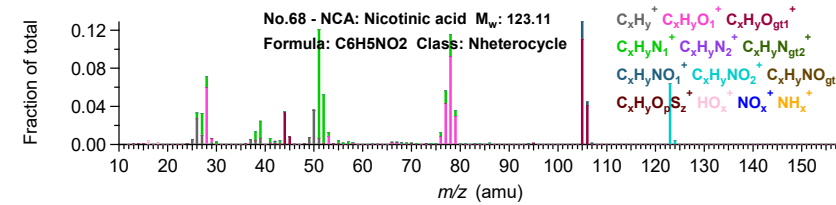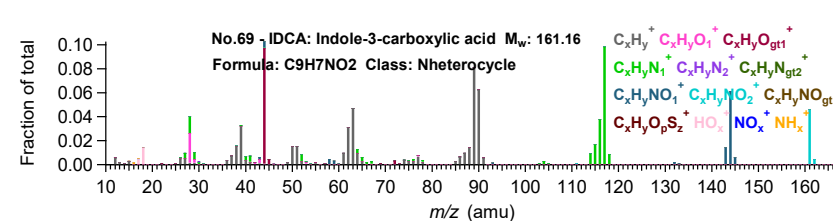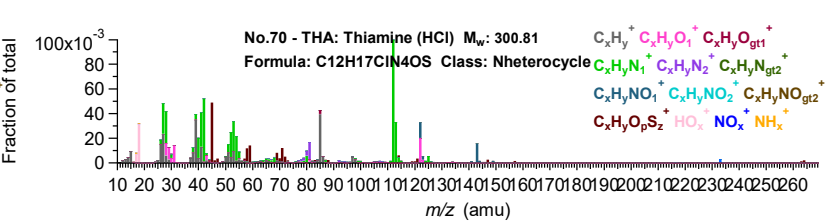

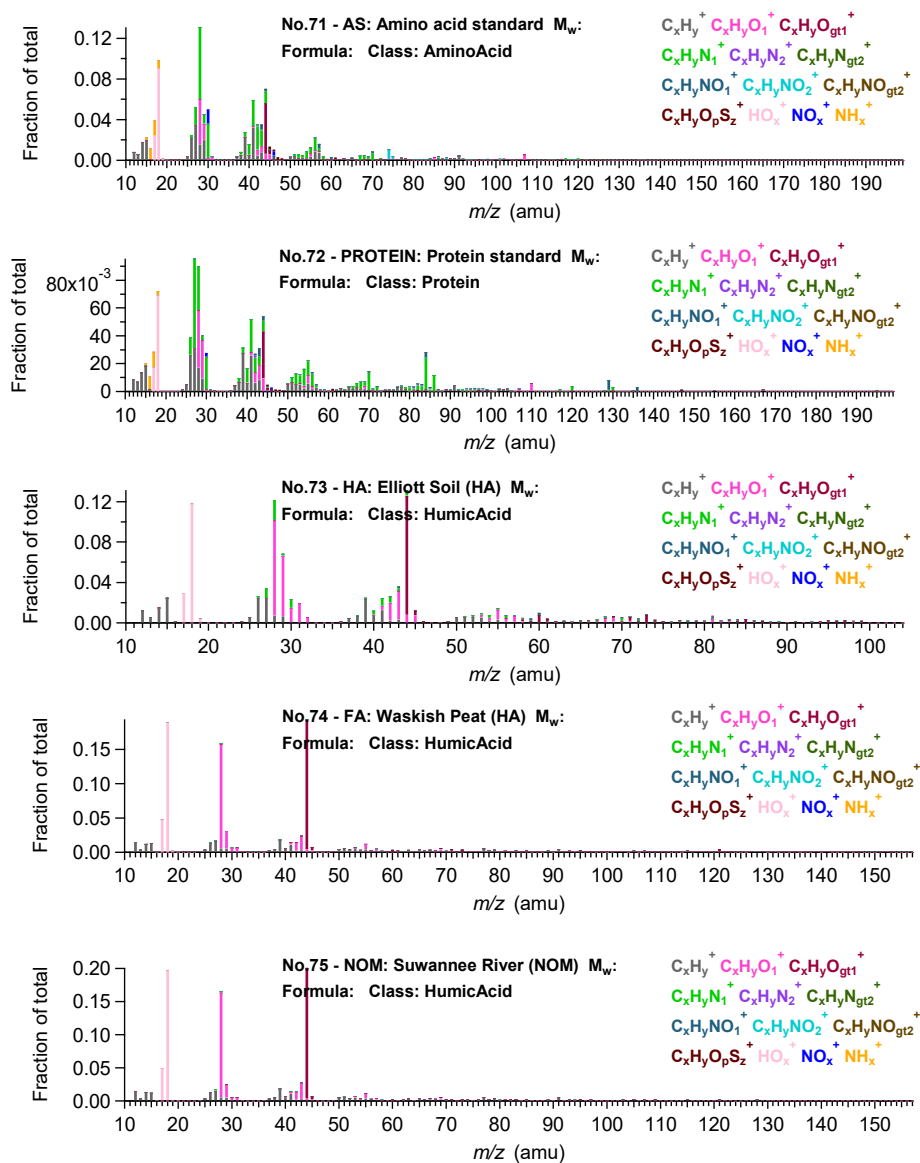

Figure S3. High resolution mass spectra of the 75 ON standards determined in this study.

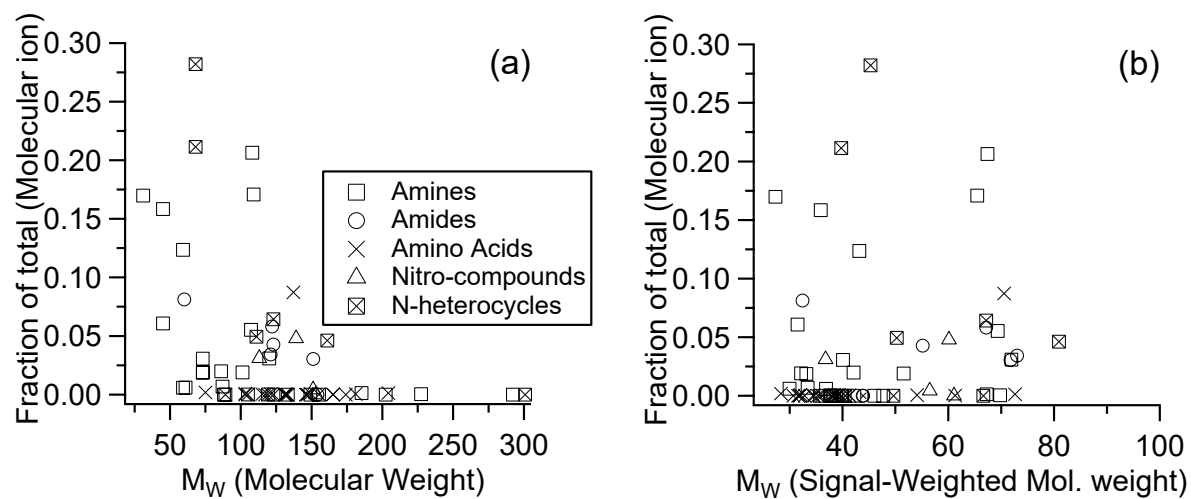

Figure S4. Mass fractions of the molecular ions in the HR-AMS spectra of the ON standards as a function of the molecular weights ( $M_w$ ) (a), and the signal-weighted molecular weights (b) (calculated as  $\sum f_i * i_{m/z}$ , where  $i_{m/z}$  is the exact mass of ion  $i$  and  $f_i$  is the mass fraction of that ion in the compound's spectrum).

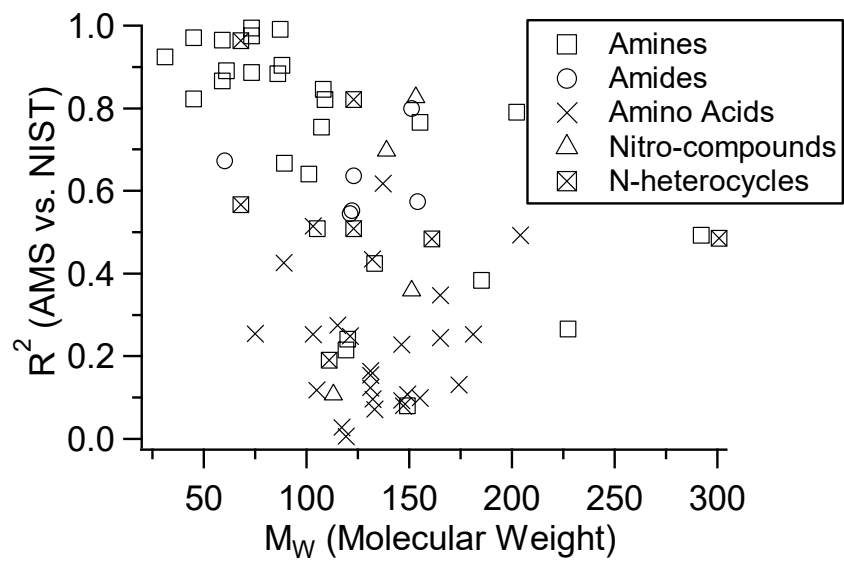

Figure S5. Correlation coefficients (Pearson's  $r^2$ ) between the HR-AMS spectra and the NIST spectra as a function of the molecular weights of the ON standards.

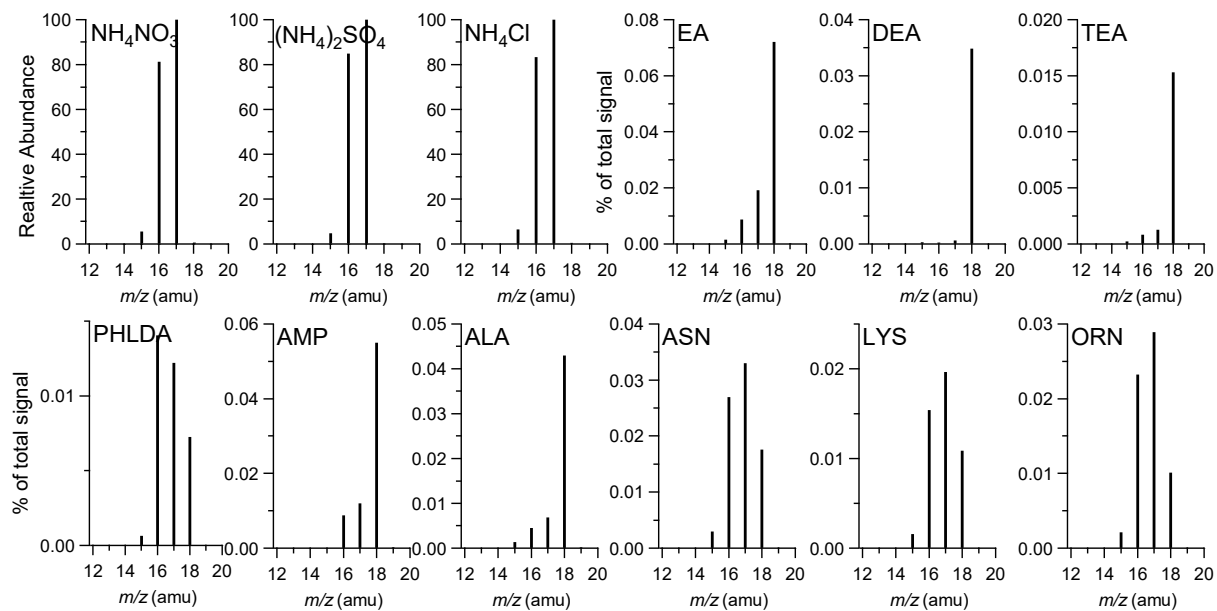

Figure S6. Mass fractional contributions of  $\text{NH}_x^+$  ion fragments in the HR-AMS spectra of ammonium nitrate, ammonium sulfate and ammonium chloride, and a few selected amines and amino acids.

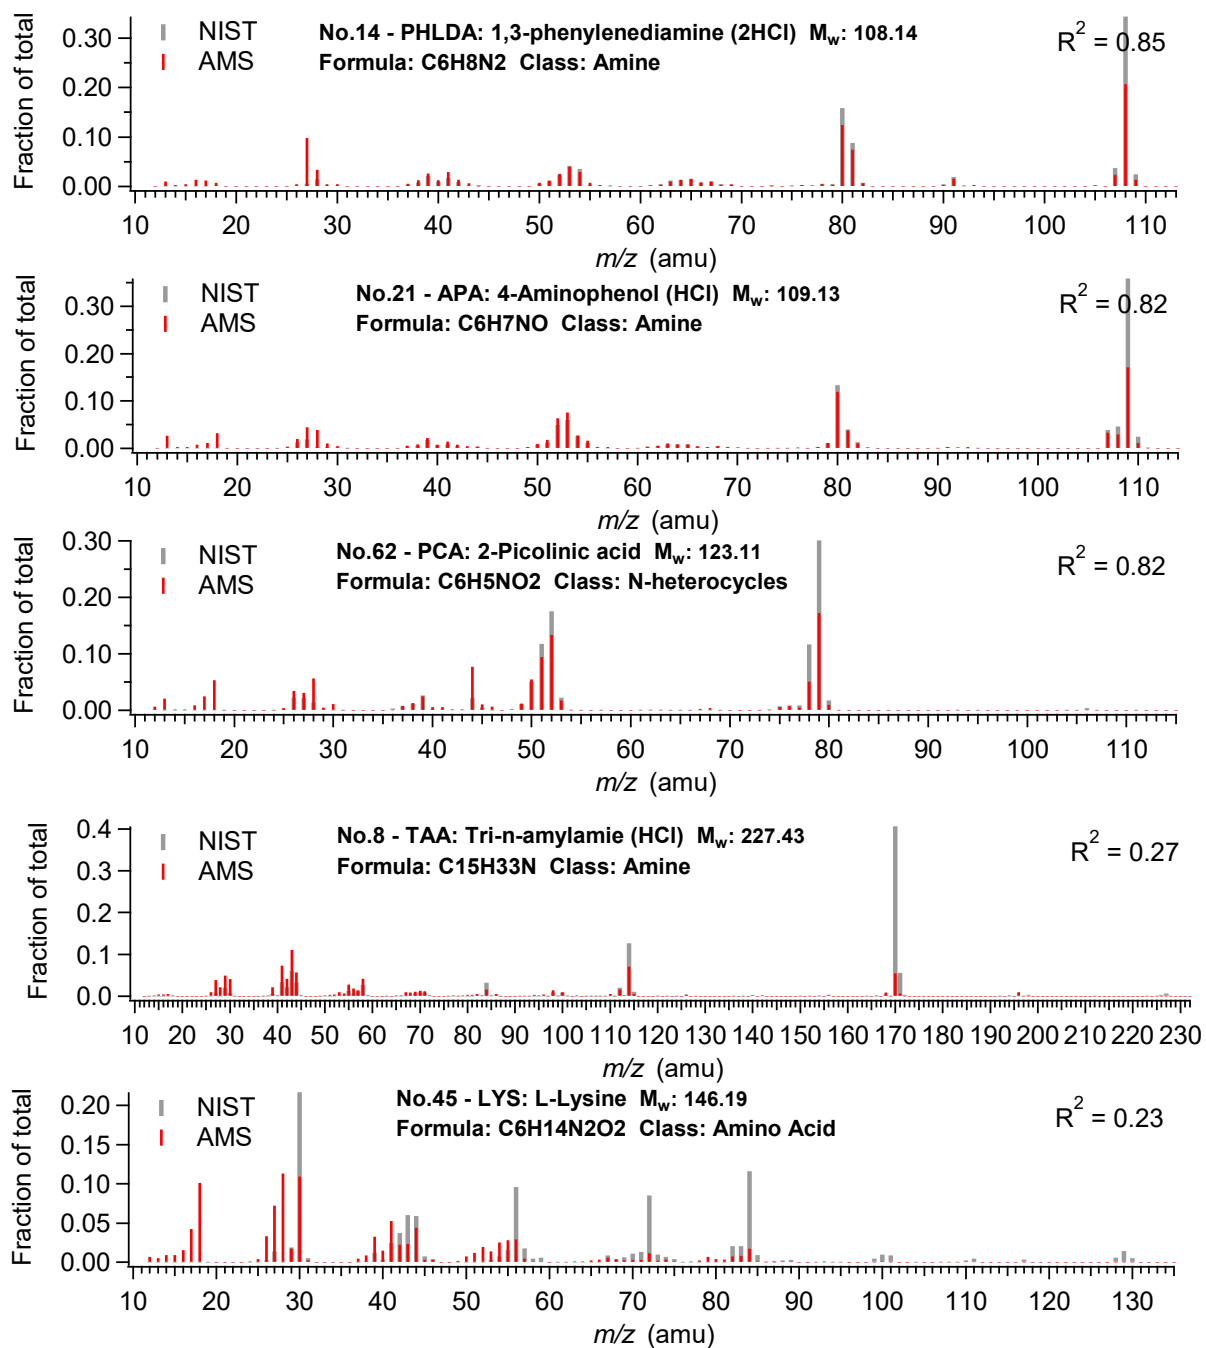

Figure S7. AMS spectra (summed in unit mass resolution from HR spectra) versus NIST spectra for a few selected ON standards.
